# Supplementary material for: Evaluation of Serological Diagnostic Test Systems Assessing the Immune Response to Japanese Encephalitis Vaccination
Source: PubMed Central journal article supplement (PMC2982812; doi:10.1371/journal.pntd.0000883), 2010-11-16

Flowchart for the paper:  
 "Evaluation of serological diagnostic test systems assessing the immune response to Japanese encephalitis vaccination"

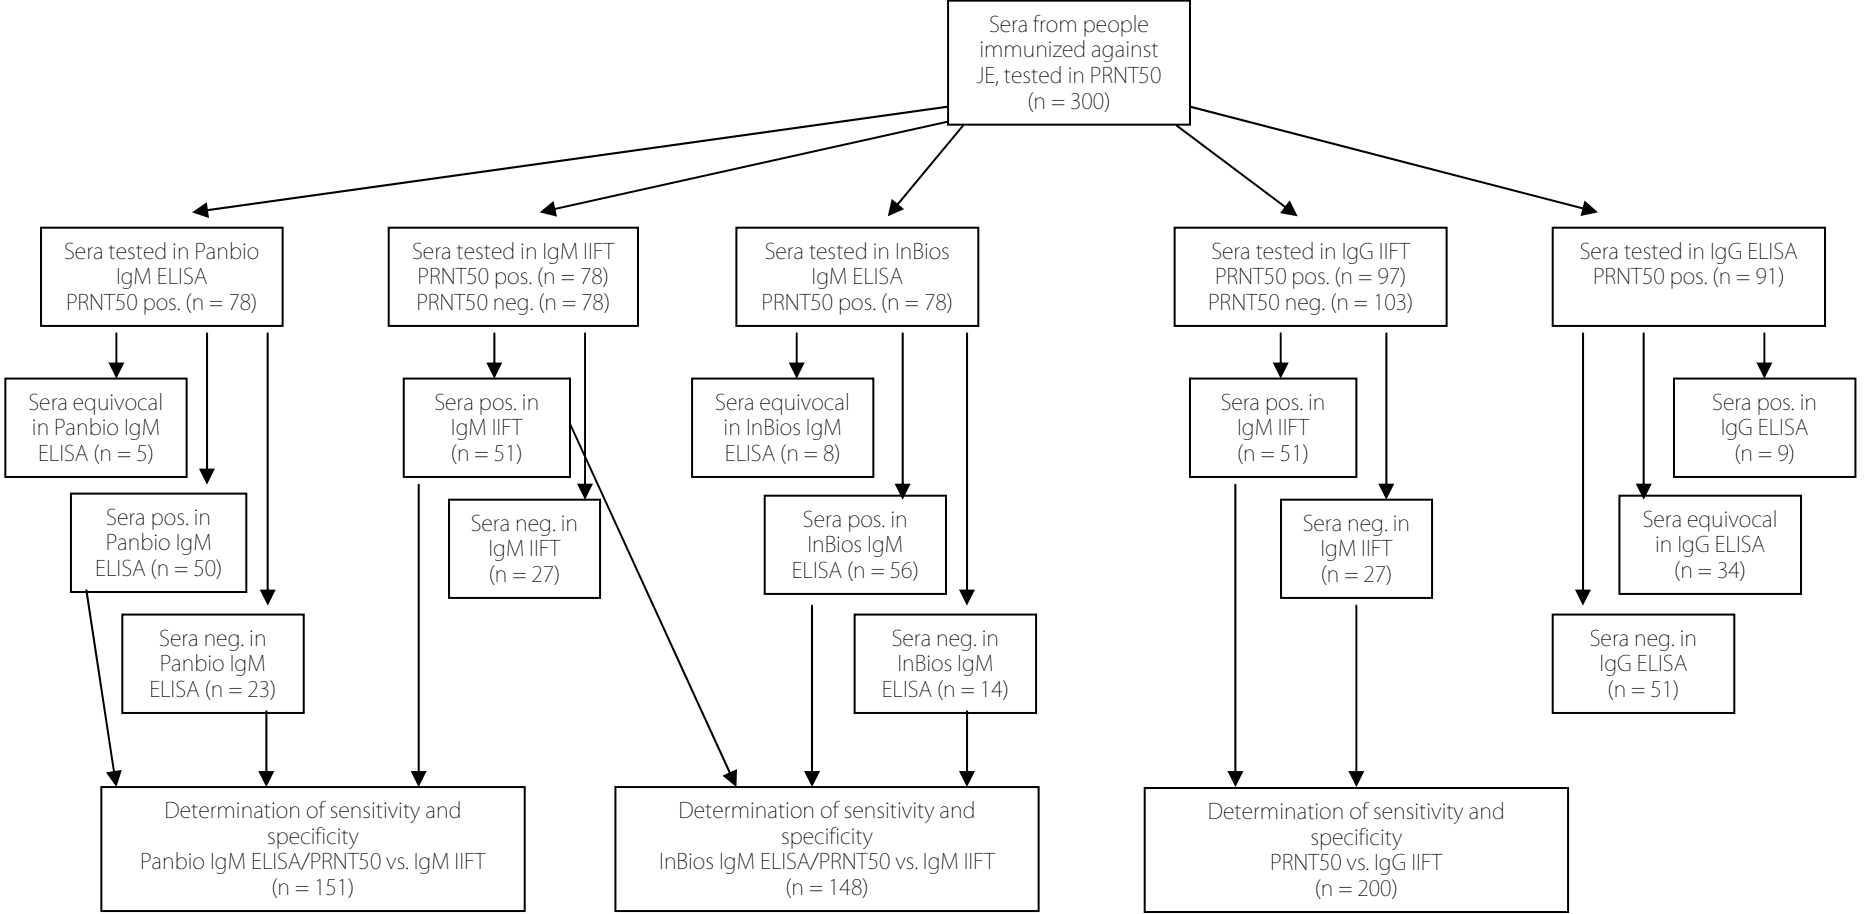

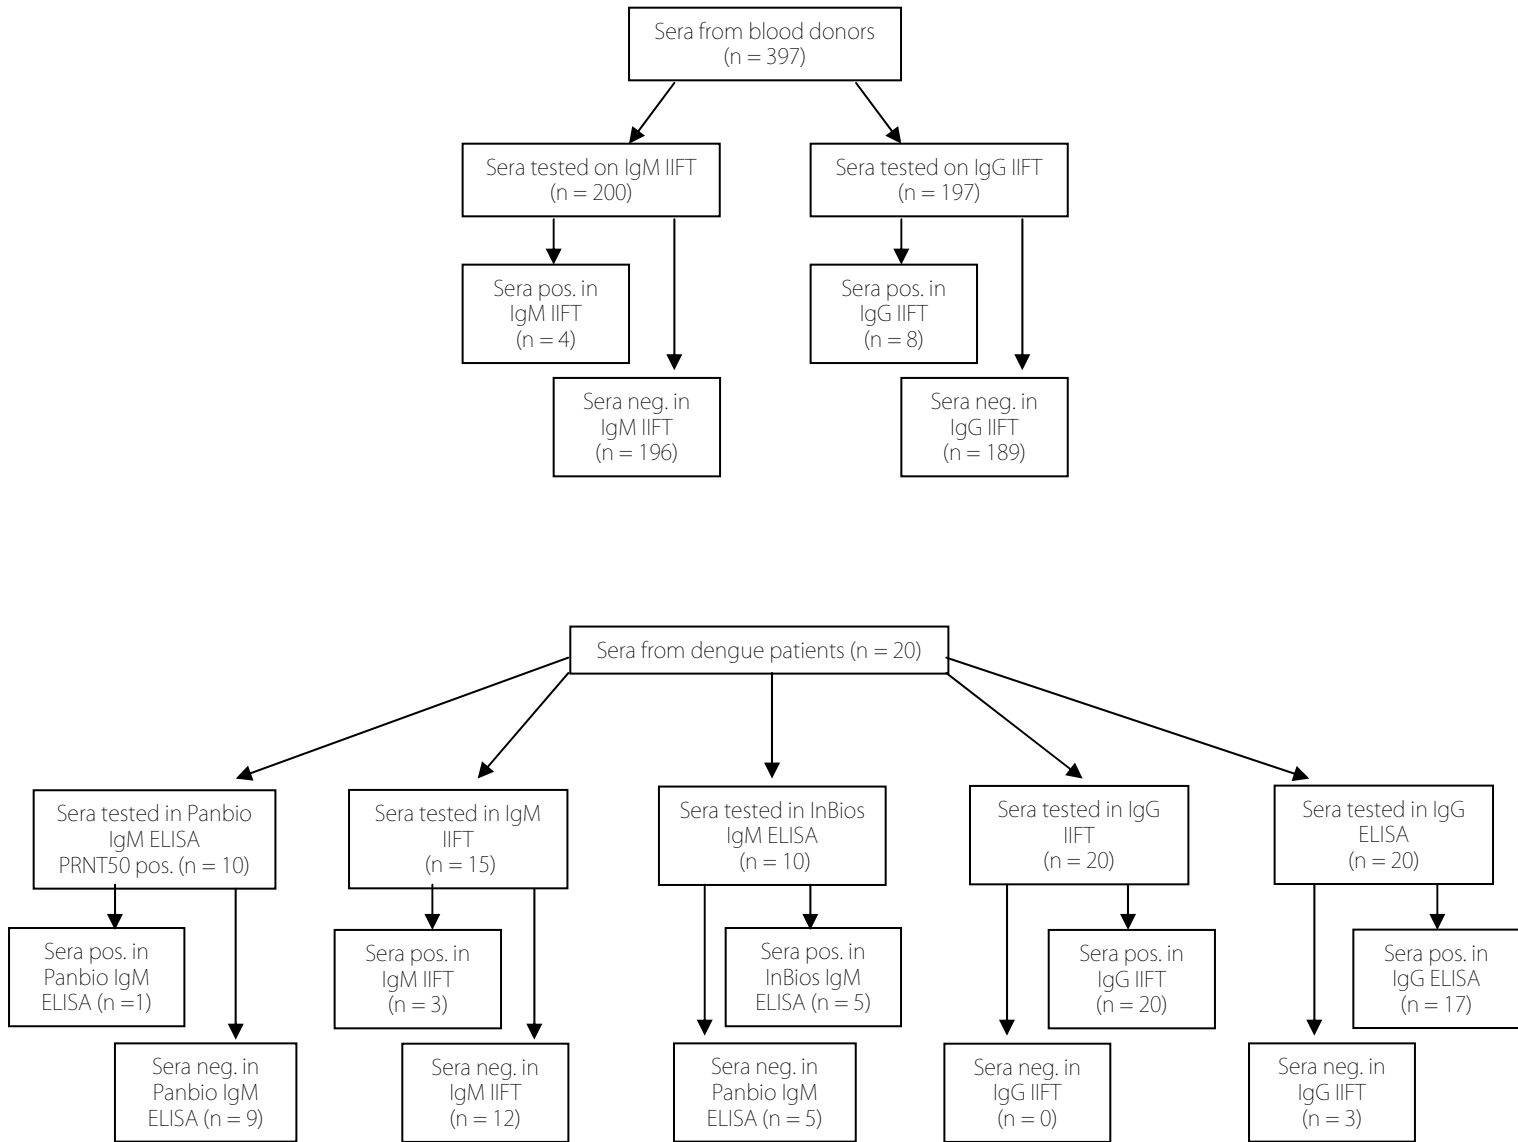

Supplement: pntd.0000883.s002.pdf [file pntd.0000883.s002.pdf]
